# Supplementary material for: Accurate, Fast and Cost-Effective Diagnostic Test for Monosomy 1p36 Using Real-Time Quantitative PCR
Source: Hindawi journal article supplement (doi:10.1155/2014/836082), 2014-01-01
Supplement: f1 [file 836082.f1.pdf]

**Supplementary TABLE 1**  $\Delta KC_t$  results for 50 normal controls

| Sample type            | Subjects | $\Delta KC_t$ |            |
|------------------------|----------|---------------|------------|
|                        |          | <i>PRKCZ</i>  | <i>SKI</i> |
|                        | 1        | -0.0074       | -0.2087    |
|                        | 2        | -0.0467       | -0.1680    |
|                        | 3        | 0.0793        | 0.0978     |
|                        | 4        | 0.0923        | -0.1688    |
|                        | 5        | -0.1521       | -0.0831    |
|                        | 6        | -0.0198       | 0.0886     |
|                        | 7        | 0.0035        | 0.0921     |
|                        | 8        | -0.1814       | -0.0329    |
|                        | 9        | -0.2216       | -0.1132    |
|                        | 10       | 0.0379        | -0.2697    |
|                        | 11       | -0.2022       | -0.1232    |
|                        | 12       | 0.3551        | -0.2088    |
|                        | 13       | -0.0598       | -0.0730    |
|                        | 14       | -0.1319       | -0.1181    |
|                        | 15       | -0.1492       | -0.2148    |
|                        | 16       | -0.2138       | -0.0623    |
|                        | 17       | 0.2010        | -0.2487    |
|                        | 18       | 0.3441        | 0.1956     |
|                        | 19       | -0.0950       | -0.3521    |
|                        | 20       | -0.1465       | -0.2946    |
|                        | 21       | -0.1079       | -0.2855    |
|                        | 22       | -0.0241       | -0.2563    |
|                        | 23       | -0.0348       | -0.2170    |
|                        | 24       | -0.2366       | -0.1446    |
| <b>Normal Controls</b> | 25       | 0.0103        | -0.1026    |
|                        | 26       | -0.2395       | -0.0786    |
|                        | 27       | -0.3661       | -0.2200    |
|                        | 28       | -0.2513       | -0.0660    |
|                        | 29       | -0.3256       | -0.3794    |
|                        | 30       | 0.0228        | -0.3301    |
|                        | 31       | -0.2923       | -0.2553    |
|                        | 32       | -0.1458       | -0.3089    |
|                        | 33       | -0.0347       | -0.1881    |
|                        | 34       | -0.1632       | -0.1509    |
|                        | 35       | -0.0198       | 0.0069     |
|                        | 36       | -0.2690       | -0.1764    |
|                        | 37       | 0.2061        | -0.1931    |
|                        | 38       | -0.0330       | -0.1283    |
|                        | 39       | -0.1300       | -0.1682    |
|                        | 40       | 0.0382        | 0.0818     |
|                        | 41       | 0.0733        | -0.2126    |
|                        | 42       | -0.0118       | 0.1018     |
|                        | 43       | 0.1093        | 0.0932     |
|                        | 44       | -0.0951       | -0.2411    |
|                        | 45       | -0.1358       | -0.1519    |
|                        | 46       | -0.1325       | -0.1884    |
|                        | 47       | 0.0384        | -0.0276    |
|                        | 48       | 0.0707        | 0.1046     |
|                        | 49       | 0.0891        | 0.1431     |
|                        | 50       | -0.1565       | -0.1126    |

$\Delta KC_t$ : fold copy number change.

**Supplementary TABLE 2.**  $\Delta KC_t$  results for 39 patients with monosomy 1p36

| Sample type           | Subjects | $\Delta KC_t$ |                |
|-----------------------|----------|---------------|----------------|
|                       |          | <i>PRKCZ</i>  | <i>SKI</i>     |
|                       | 1        | -1.0444       | -1.5803        |
|                       | 2        | -0.9740       | -1.0794        |
|                       | 3        | -0.9203       | -1.1887        |
|                       | 4        | -1.2644       | -1.2929        |
|                       | 5        | -1.1825       | -1.4869        |
|                       | 6        | -1.1014       | -1.1596        |
|                       | 7        | -1.2279       | -1.3524        |
|                       | 8        | -1.1512       | -1.3902        |
|                       | 9        | -1.0553       | -1.2166        |
|                       | 10       | -1.1885       | -1.0710        |
|                       | 11       | -1.2278       | <b>-0.2876</b> |
|                       | 12       | -0.9493       | -1.3007        |
|                       | 13       | -0.7394       | -1.0284        |
|                       | 14       | -0.8178       | -0.8545        |
|                       | 15       | -0.9758       | -1.3748        |
|                       | 16       | -1.1804       | -0.8959        |
|                       | 17       | -0.7972       | -0.8640        |
|                       | 18       | -0.8646       | -1.2867        |
|                       | 19       | -0.7494       | -1.1506        |
| <b>Positive Group</b> | 20       | -0.8139       | -0.7105        |
|                       | 21       | -0.8971       | -0.5823        |
|                       | 22       | -0.7758       | -0.7017        |
|                       | 23       | -0.7976       | -0.7339        |
|                       | 24       | -0.7712       | -0.9568        |
|                       | 25       | -0.6676       | -0.7665        |
|                       | 26       | -0.8649       | -1.0072        |
|                       | 27       | -1.0624       | -1.0569        |
|                       | 28       | -0.8522       | -1.0492        |
|                       | 29       | -0.9593       | -1.0733        |
|                       | 30       | -0.9222       | -1.1846        |
|                       | 31       | -1.0196       | -1.2841        |
|                       | 32       | -1.0632       | -1.1287        |
|                       | 33       | -1.1011       | -0.9986        |
|                       | 34       | -0.9634       | -1.1797        |
|                       | 35       | -0.7056       | -0.6125        |
|                       | 36       | -0.8442       | -0.5479        |
|                       | 37       | -1.1256       | -0.6454        |
|                       | 38       | -1.1701       | -0.7919        |
|                       | 39       | -1.0243       | -1.2477        |

$\Delta KC_t$ : fold copy number change.  $\Delta KC_t$  result of the *SKI* marker for patient 11 is in bold and it indicates the presence of two allelic copies of *SKI* in this patient. This patient had hemizygous microdeletion of *PRKCZ* ( $\Delta KC_t = -1.2278$ ), confirming that he has monosomy 1p36. Equal results were obtained by MLPA (data not shown).
